# Supplementary material for: Identification of MAP kinase pathways as therapeutic targets in gallbladder carcinoma using targeted parallel sequencing
Source: PubMed Central journal article supplement (PMC5482657; doi:10.18632/oncotarget.16751), 2017-03-31
Supplement: oncotarget-08-36319-s001.pdf [file oncotarget-08-36319-s001.pdf]

# Identification of MAP kinase pathways as therapeutic targets in gallbladder carcinoma using targeted parallel sequencing

## Supplementary Materials

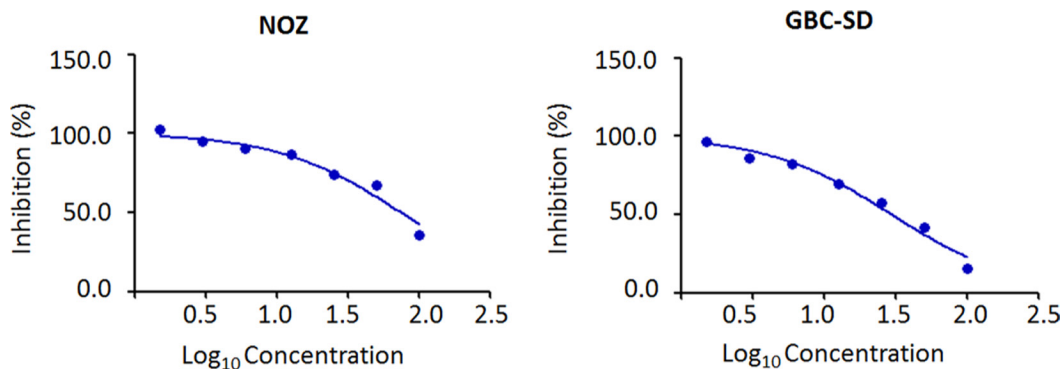

**Figure 1:** NOZ and GBC-SD cells were treated with different doses of iCRT-14 for 48 h. The MTT assay was performed to evaluate cell growth ability.

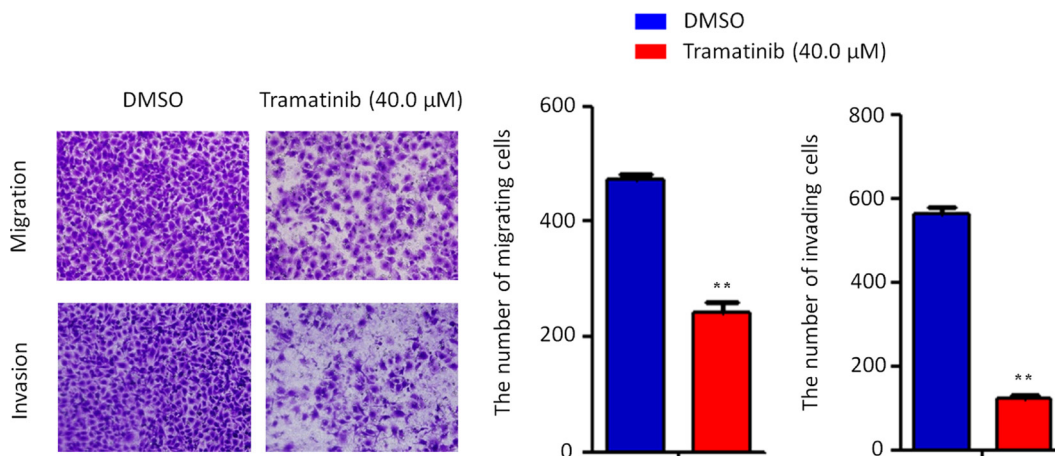

**Figure 2:** Trametinib inhibited cell migration and invasion in GBC-SD cells. The representative images of migrated/invaded cells (left panels). Histograms, corresponding to upper panels, show means ± SD of cell numbers from three independent assays (right panels). Statistically significant differences were indicated: \*\**P* < 0.01.

**Supplementary Table 1: Clinicopathologic characteristics of GBC patients used in this study for targeted parallel sequencing**

| Sample ID | Age at study entry | Gender | Diagnosis | TNM Stage                                    | Tumor site  | Histopathological subtypes | Presence of jaundice | Presence of gallbladder stones |
|-----------|--------------------|--------|-----------|----------------------------------------------|-------------|----------------------------|----------------------|--------------------------------|
| T4        | 66                 | F      | GBC       | T <sub>2</sub> N <sub>1</sub> M <sub>0</sub> | Fundus/body | low                        | NO                   | YES                            |
| T5        | 54                 | F      | GBC       | T <sub>3</sub> N <sub>0</sub> M <sub>0</sub> | Fundus/body | low                        | NO                   | NO                             |
| T7        | 73                 | F      | GBC       | T <sub>3</sub> N <sub>1</sub> M <sub>0</sub> | Fundus/body | low                        | NO                   | NO                             |
| T9        | 68                 | M      | GBC       | T <sub>3</sub> N <sub>2</sub> M <sub>0</sub> | Fundus/body | low                        | NO                   | NO                             |
| T13       | 92                 | F      | GBC       | T <sub>3</sub> N <sub>1</sub> M <sub>0</sub> | Neck        | moderate                   | NO                   | NO                             |
| T14       | 48                 | F      | GBC       | T <sub>4</sub> N <sub>1</sub> M <sub>0</sub> | Fundus/body | low                        | NO                   | YES                            |
| T15       | 61                 | M      | GBC       | T <sub>2</sub> N <sub>1</sub> M <sub>0</sub> | Fundus/body | high                       | NO                   | NO                             |
| T16       | 79                 | M      | GBC       | T <sub>2</sub> N <sub>1</sub> M <sub>0</sub> | Neck        | low                        | NO                   | YES                            |
| T17       | 66                 | M      | GBC       | T <sub>4</sub> N <sub>1</sub> M <sub>0</sub> | Fundus/body | high                       | NO                   | NO                             |
| T30       | 63                 | M      | GBC       | T <sub>4</sub> N <sub>0</sub> M <sub>0</sub> | Fundus/body | low                        | YES                  | NO                             |
| T31       | 62                 | F      | GBC       | T <sub>3</sub> N <sub>1</sub> M <sub>1</sub> | Fundus/body | moderate                   | YES                  | NO                             |
| T34       | 65                 | F      | GBC       | T <sub>3</sub> N <sub>1</sub> M <sub>0</sub> | Fundus/body | moderate                   | NO                   | YES                            |
| T36       | 49                 | M      | GBC       | T <sub>4</sub> N <sub>1</sub> M <sub>1</sub> | Fundus/body | low                        | NO                   | YES                            |
| T44       | 52                 | F      | GBC       | T <sub>3</sub> N <sub>2</sub> M <sub>0</sub> | Fundus/body | low                        | NO                   | NO                             |

**Supplementary Table 2: A list of target genes.** See Supplementary\_Table\_2

**Supplementary Table 3: Recurrent mutations identified in this study.** See Supplementary\_Table\_3
